# Supplementary material for: Freshly prepared magnetic ferrite for the speciation of silver using dispersive micro-solid phase extraction and electrothermal atomic absorption spectrometry
Source: Royal Society of Chemistry journal article supplement (doi:10.1039/c9ja00241c), 2019-01-01
Supplement: c9ja00241c1.pdf [file c9ja00241c1.pdf]

| <b>Table S1.</b> Ag(I) and Ag(0) recovery at different Ag(I)/Ag(0) ratio |                           |             |                                |             |
|--------------------------------------------------------------------------|---------------------------|-------------|--------------------------------|-------------|
| Ag(I)/Ag(0)                                                              | Ag(I), ng L <sup>-1</sup> |             | Ag (total), ng L <sup>-1</sup> |             |
|                                                                          | Found <sup>a,b</sup>      | Recovery, % | Found <sup>a,b</sup>           | Recovery, % |
| 100/5000 <sup>c</sup>                                                    | 99 ± 5                    | 99          | 5108 ± 25                      | 100         |
| 100/1000 <sup>d</sup>                                                    | 101 ± 6                   | 101         | 1095 ± 15                      | 99          |
| 100/100                                                                  | 99 ± 4                    | 99          | 205 ± 4                        | 102         |
| 1000 <sup>d</sup> /100                                                   | 1002 ± 14                 | 100         | 1109 ± 4                       | 101         |
| 5000 <sup>c</sup> /100                                                   | 4898 ± 30                 | 98          | 5092 ± 21                      | 100         |

<sup>a</sup> n=5

<sup>b</sup> after Ag(0) oxidation to Ag(I)

<sup>c</sup> diluted 50 times after mixing to determine the main specie

<sup>d</sup> diluted 10 times after mixing to determine the main specie

**Table S2:** Analytical results obtained for Ag(I) and Ag(0) determination in lixiviates of salads

| Sample   | Lixiviated, ng g <sup>-1</sup> |        |                    |             |             |        | Total <sup>a</sup> , ng g <sup>-1</sup> |
|----------|--------------------------------|--------|--------------------|-------------|-------------|--------|-----------------------------------------|
|          | Added                          |        | Found <sup>a</sup> |             | Recovery, % |        |                                         |
|          | Ag (I)                         | Ag (0) | Ag (I)             | Ag (0)      | Ag (I)      | Ag (0) |                                         |
| Salad 1  | 0                              | 0      | 0.08 ± 0.01        | <0.006      | -           | -      | 3.32 ± 0.03                             |
|          | 0.2                            | 0.2    | 0.27 ± 0.02        | 0.21 ± 0.02 | 95          | 104    |                                         |
| Salad 2  | 0                              | 0      | <0.006             | <0.006      | -           | -      | 0.28 ± 0.02                             |
|          | 0.2                            | 0.2    | 0.20 ± 0.02        | 0.20 ± 0.01 | 100         | 99     |                                         |
| Salad 3  | 0                              | 0      | 0.05 ± 0.02        | 0.02 ± 0.01 | -           | -      | 3.5 ± 0.02                              |
|          | 0.2                            | 0.2    | 0.25 ± 0.02        | 0.23 ± 0.02 | 100         | 100    |                                         |
| Salad 4  | 0                              | 0      | 0.10 ± 0.03        | <0.006      | -           | -      | 5.71 ± 0.02                             |
|          | 0.2                            | 0.2    | 0.31 ± 0.03        | 0.19 ± 0.01 | 105         | 104    |                                         |
| Salad 5  | 0                              | 0      | <0.06              | 0.12 ± 0.01 | -           | -      | 8.42 ± 0.02                             |
|          | 0.2                            | 0.2    | 0.21 ± 0.02        | 0.33 ± 0.02 | 104         | 103    |                                         |
| Salad 6  | 0                              | 0      | 0.04 ± 0.02        | 0.26 ± 0.02 | -           | -      | 23.7 ± 0.2                              |
|          | 0.2                            | 0.2    | 0.25 ± 0.03        | 0.45 ± 0.03 | 96          | 98     |                                         |
| Salad 7  | 0                              | 0      | <0.006             | 0.20 ± 0.01 | -           | -      | 19.2 ± 0.1                              |
|          | 0.2                            | 0.2    | 0.19 ± 0.03        | 0.39 ± 0.02 | 97          | 97     |                                         |
| Salad 8  | 0                              | 0      | <0.006             | 0.20 ± 0.02 | -           | -      | 17.32 ± 0.03                            |
|          | 0.2                            | 0.2    | 0.21 ± 0.03        | 0.42 ± 0.02 | 104         | 108    |                                         |
| Salad 9  | 0                              | 0      | <0.006             | <0.006      | -           | -      | 0.37 ± 0.01                             |
|          | 0.2                            | 0.2    | 0.19 ± 0.03        | 0.21 ± 0.01 | 97          | 105    |                                         |
| Salad 10 | 0                              | 0      | <0.006             | 0.05 ± 0.03 | -           | -      | 3.1 ± 0.02                              |
|          | 0.2                            | 0.2    | 0.19 ± 0.03        | 0.25 ± 0.03 | 96          | 106    |                                         |

<sup>a</sup> a mean value of three determinations ± standard deviation
